# Supplementary material for: Salt-assisted rapid transformation of NaYF4:Yb3+,Er3+ nanocrystals from cubic to hexagonal
Source: Royal Society of Chemistry journal article supplement (doi:10.1039/c4ce00650j), 2014-01-01
Supplement: c4ce00650j1.pdf [file c4ce00650j1.pdf]

## Supporting information

### Salt-assisted the Rapid Transformation of NaYF<sub>4</sub>: Yb<sup>3+</sup>,Er<sup>3+</sup> Nanocrystals from Cubic to Hexagonal

Bangda Yin, Wenli Zhou, Chengzhi Li, Qian Long, Jianhui Deng, Haitao Li, Youyu Zhang\*,  
Shouzhao Yao

Key Laboratory of Chemical Biology and Traditional Chinese Medicine Research (Ministry  
of Education, College of Chemistry and Chemical Engineering, Hunan Normal University,  
Changsha 410081, PR China

Table S. The influence of hydrothermal time, temperature and molar ratio of phosphate to  
Ln<sup>3+</sup> on the product phase.

| Temperature (°C)                                           | 180 |   | 200 |   |
|------------------------------------------------------------|-----|---|-----|---|
| n (PO <sub>4</sub> <sup>3-</sup> ) / n (Ln <sup>3+</sup> ) | 4   | 6 | 4   | 6 |
| Time (h)                                                   | 3.5 | 3 | 3   | 2 |

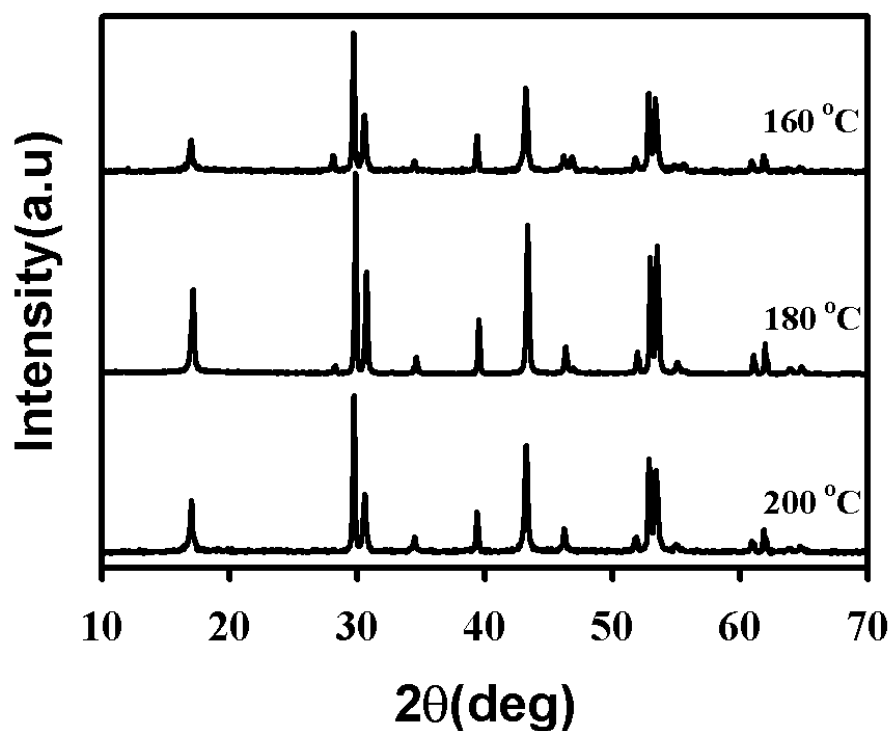

Fig. S 1 XRD pattern of NaYF<sub>4</sub>:Yb<sup>3+</sup>,Er<sup>3+</sup> prepared in the assistance of Na<sub>2</sub>HPO<sub>4</sub>·12H<sub>2</sub>O (PO<sub>4</sub><sup>3-</sup>/Ln<sup>3+</sup> = 4) at different hydrothermal temperature for 3 h.

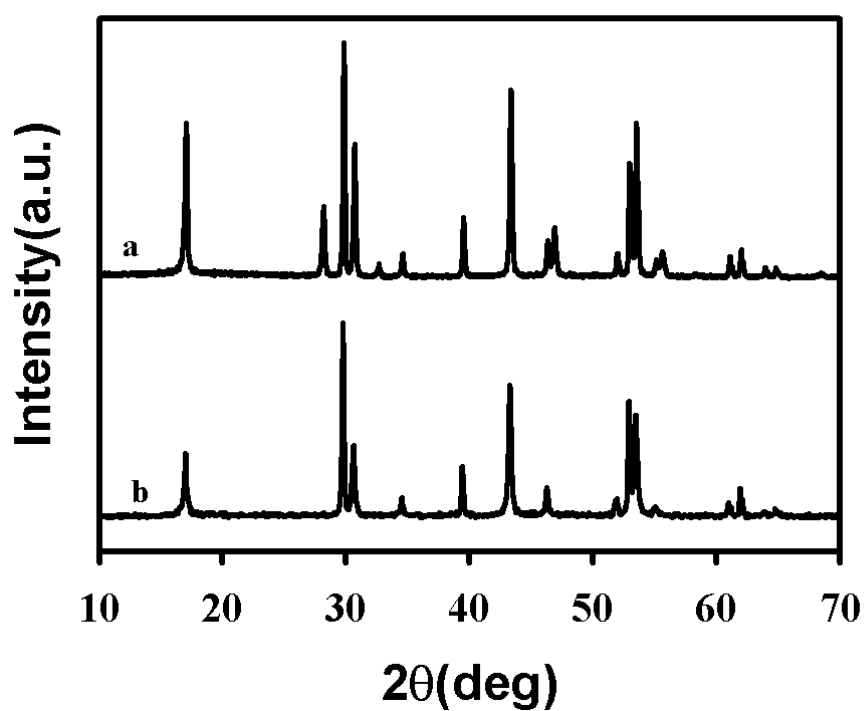

Fig. S 2 XRD pattern of NaYF<sub>4</sub>:Yb<sup>3+</sup>,Er<sup>3+</sup> nanocrystals prepared in the assistance of Na<sub>2</sub>HPO<sub>4</sub>·12H<sub>2</sub>O with the molar ratio (PO<sub>4</sub><sup>3-</sup>/Ln<sup>3+</sup>) were (a) 4 and (b) 6 at 200 °C for 2 h.

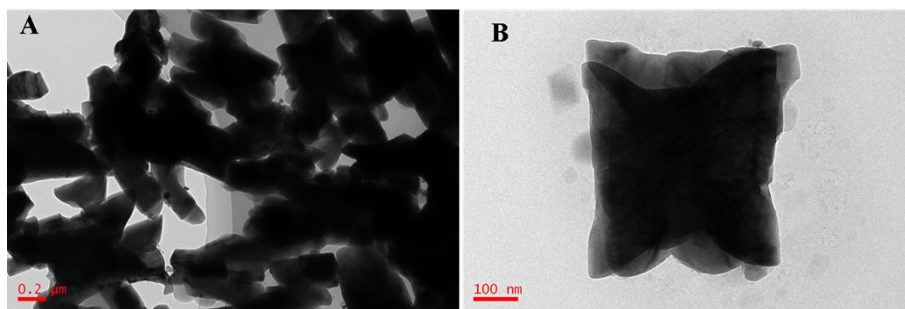

Fig. S 3 (A) TEM images of  $\text{NaYF}_4:\text{Yb}^{3+},\text{Er}^{3+}$  crystals ( $\text{PO}_4^{3-} / \text{Ln}^{3+} = 6$ ) for 3 h. (B) TEM images of one particle prepared in the assistance of  $\text{Na}_2\text{HPO}_4 \cdot 12\text{H}_2\text{O}$  ( $\text{PO}_4^{3-}/\text{Ln}^{3+} = 6$ ).

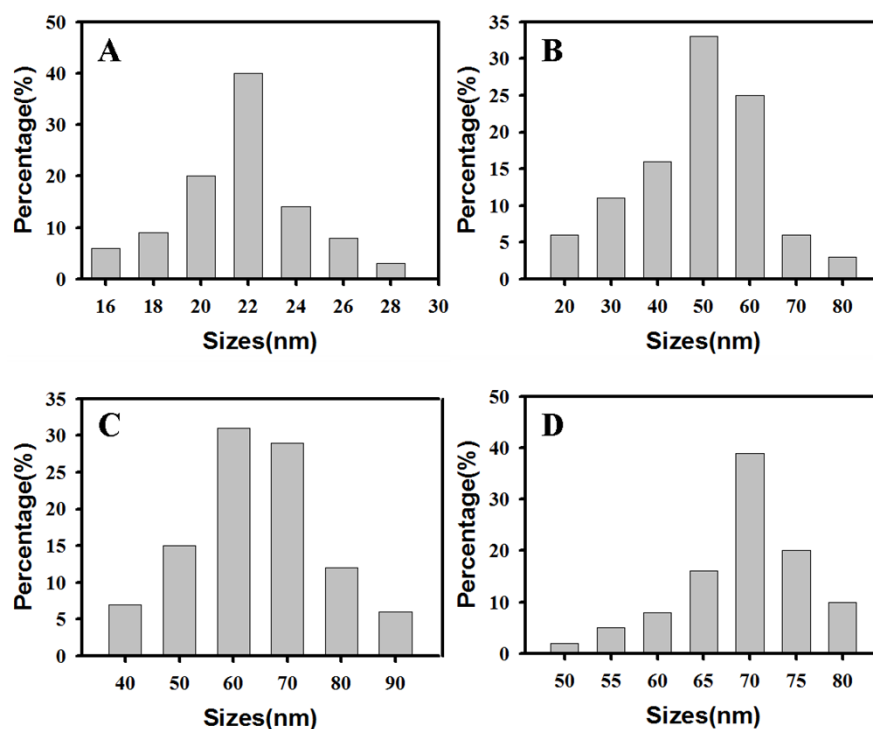

Fig. S 4 The corresponding particle size distribution histograms of  $\text{NaYF}_4:\text{Yb}^{3+},\text{Er}^{3+}$  nanocrystals prepared in the assistance of  $\text{Na}_2\text{HPO}_4 \cdot 12\text{H}_2\text{O}$  ( $\text{PO}_4^{3-}/\text{Ln}^{3+} = 4$ ) when the reaction time was (A) 1, (B) 2, (C) 3 and (D) 3.5 h.

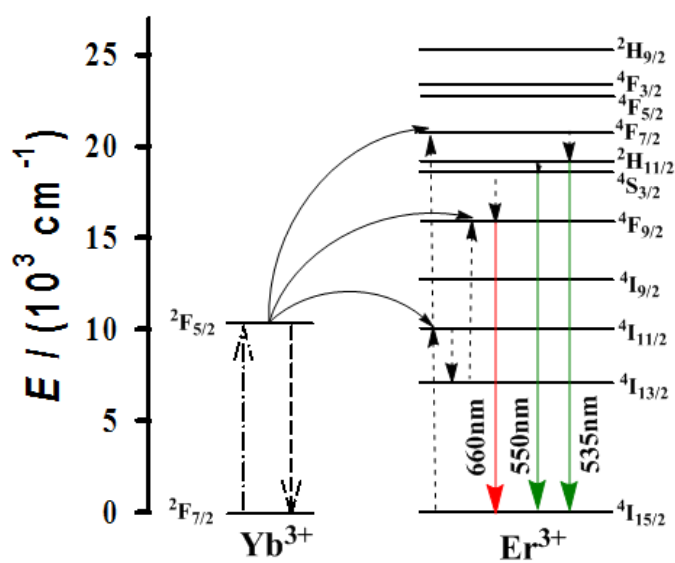

Fig. S 5 Schematic diagram of upconversion processes in an  $\text{Yb}^{3+}, \text{Er}^{3+}$  codoped system upon the excitation of 980 nm laser.
